# Supplementary material for: Modulation of Aub–TDRD interactions elucidates piRNA amplification and germplasm formation
Source: Life Sci Alliance. 2020 Dec 29;4(3):e202000912. doi: 10.26508/lsa.202000912 (PMC7772777; doi:10.26508/lsa.202000912)
Supplement: Supplementary file 2 [file LSA-2020-00912_TableS2.xlsx]

## Sheet: Table S2
Table S2. Adult offspring from aubRK mothers are always agametic.
Maternal genotype	Female fertility		Progeny fertility
	Eclosion %	N	Germline presence %	N
y w	88.1	513	100	50
aub	0	189	0	0
aubWT	64.9	511	82	100
aubRK	4.1	519	0	154
y w = y1 w1
aub = aubQC42/HN2
aubWT = aubQC42/HN2; nos>3xHA-aubWT
aubRK = aubQC42/HN2; nos>3xHA-aubRK
