# Supplementary material for: Modulation of Aub–TDRD interactions elucidates piRNA amplification and germplasm formation
Source: Life Sci Alliance. 2020 Dec 29;4(3):e202000912. doi: 10.26508/lsa.202000912 (PMC7772777; doi:10.26508/lsa.202000912)
Supplement: Supplementary file 8 [file LSA-2020-00912_TableS5.xlsx]

## Sheet: Table S5
Table S5. List of antibodies used for western blot analysis.
Antigen	Antibody	Source	Species	Dilution/Final concentration
Ago3	7B4-C2	Senti et al, 2015	Mouse	1:1000
Ago3	Ago3-380	This work	Rabbit	1 μg/ml
Aub	Aub-83	Vourekas et al, 2016	Rabbit	0.5 μg/ml
HA	16B12	Covance	Mouse	1:1000
Piwi	Piwi-N7	Vrettos et al, 2017	Mouse	1:5000
sDMA	SYM11	MiIlipore-SIGMA	Rabbit	1:1000
Tub	E7	DSHB	Mouse	1:5000
Tud	7D1-C7	Nagao et al, 2011	Mouse	1:100
Vas	Vas-2	Vrettos et al, 2017	Rabbit	1 μg/ml
Nagao A, Sato K, Nishida KM, Siomi H, Siomi MC. 2011 Gender-Specific Hierarchy in Nuage Localization of PIWI-Interacting RNA Factors in Drosophila. Front Genet 2: 55. doi: 10.3389/fgene.2011.00055
Senti KA, Jurczak D, Sachidanandam R, Brennecke J. 2015 piRNA-guided slicing of transposon transcripts enforces their transcriptional silencing via specifying the nuclear piRNA repertoire. Genes Dev 29: 1747-1762. doi: 10.1101/gad.267252.115
Vourekas A, Alexiou P, Vrettos N, Maragkakis M, Mourelatos Z. 2016. Sequence-dependent but not sequence-specific piRNA adhesion traps mRNAs to the germ plasm. Nature 531: 390-394. doi: 10.1038/nature17150
Vrettos N, Maragkakis M, Alexiou P, Mourelatos Z. 2017. Kc167, a widely used Drosophila cell line, contains an active primary piRNA pathway. RNA 23: 108-118. doi: 10.1261/rna.059139.116
